# Supplementary material for: Mid-Holocene reinforcement of North Atlantic atmospheric circulation variability from a western Baltic lake sediment record
Source: Copernicus journal article supplement (doi:10.5194/egusphere-2022-582), 2022-08-15
Supplement: Supplementary file [file egusphere-2022-582-AC2-supplement.pdf]

## 1 Response to the reviewers' comments

2  
3 We thank the two reviewers and editor Denis-Didier Rousseau for their constructive and  
4 detailed comments to our manuscript. In the following we will respond to all concerns  
5 raised, first answering the main point of criticism, and then in a point-by-point reply.  
6  
7  
8

### 9 Detailed response (qualitative NAO polarity changes in TOC from KKJ sediments):

10  
11 We agree with Referee #1 about the non-stationary behavior of changes in the North Atlantic  
12 Oscillation (NAO) and the problems of covering these changes in individual records. To  
13 respond to the Referee's comments and perform the requested further examinations, we now  
14 compare our TOC record from KKJ sediments with 5 different NAO reconstructions, updated  
15 the connected Fig. 12 and added new paragraphs to chapter 5.3.2., discussing the broad  
16 covariance and remaining disagreements between the KKJ TOC and NAO records, as well as  
17 the possible underlying mechanisms (see the revised chapter and Fig. 12 below). However,  
18 despite the resulting visible matches, the correlation coefficients between the KKJ TOC record  
19 and NAO reconstructions >1000 years (all sampled to 20-year resolution) are low between  
20 0.14 and 0.32 with significance levels between 0.05 and 0.2. Most likely and important reason  
21 are the uncertainties of in particular the individual radiocarbon-based chronologies, allowing  
22 to allocate shorter-term variability and hampering the statistical 1 to 1 matching of these  
23 changes. For example, the average chronological uncertainty of the investigated KKJ sediment  
24 record is  $\pm 79$  years. Considering this technical limitation, we think that correlation coefficients  
25 and significance levels do not reflect a realistic degree of similarity between the records and  
26 prefer not to show them.  
27

28 The revised chapter (red text is new):

### 29 5.3.2. Decadal to centennial productivity variability and NAO

30 Today, meteorology at KKJ is correlated with the predominant mode of the NAO (Fig. 11). The  
31 NAO is the major source of atmospheric circulation variability over the North Atlantic and  
32 Europe, primarily during winter (Hurrell, 1995). During its positive phase Scandinavian **winter**  
33 climate is characterized by above average temperatures, precipitation and windiness (Fig. 11)  
34 (Hurrell, 1995).

35 To investigate the preservation of decadal to centennial NAO polarity changes in KKJ  
36 sediments, we compare the TOC productivity record during SDU 3 and 4 with reconstructions  
37 of the NAO from tree rings and speleothems for the Little Ice Age/Medieval Warm Period  
38 transition (Trouet et al., 2009; Wassenburg et al., 2013), speleothems from Scotland covering  
39 the last 3000 years (Baker et al., 2015), Greenland lake sediments back to 5200 a BP (Olsen et  
40 al., 2012) and marine sediments from off Norway back to 7800 a BP (Becker et al., 2020)  
41 (Fig. 12).

42 In particular, the NAO reconstructions by Olsen et al. (2012), Trouet et al. (2012), Wassenburg  
43 et al. (2013) and Baker et al. (2015) resemble most of the multi-decadal to centennial features

44 in the TOC record from KKJ sediments (Fig.12). Productivity in the lake tends to be higher,  
45 when the NAO is in a more positive mode (Fig. 12). The three latter NAO reconstructions also  
46 co-vary with the KKJ TOC record during the last ~1200 years, when the fit with the Olsen et  
47 al. (2012) NAO reconstruction is low. A possible reason for the differences between the KKJ  
48 TOC record and Olsen et al. (2012) NAO reconstruction during this period might be the non-  
49 stationary behavior of this atmospheric seesaw that is difficult to capture in individual archives,  
50 as well as its interplay with other modes of oceanic and atmospheric variability, like e.g. the  
51 East Atlantic West Russia oscillation (Jung et al., 2003; Krichak and Alpert, 2005). Comparing  
52 our KKJ TOC record with the multi-millennial NAO reconstruction by Becker et al. (2020)  
53 reveals covariance for most of the time, but also some inconsistencies around 1800, 2400 and  
54 3700 a BP (Fig. 12). These inconsistencies might result from the proposed further influences of  
55 changes in the subpolar gyre and Atlantic Multidecadal Oscillation on this marine NAO  
56 reconstruction (Becker et al., 2020).

57 Few sporadic negative peaks in the NAO records from Greenland lake sediments and Scottish  
58 speleothems that are not reflected in the TOC record from KKJ sediments might be explained  
59 by local climate or archive-specific noise (Fig. 12). Temporal inconsistencies of a few decades  
60 between the KKJ productivity record and NAO reconstructions are likely associated with the  
61 chronological uncertainties of, in particular, the <sup>14</sup>C-dated sediment archives (Fig. 12). For  
62 example, the average chronological uncertainty for the investigated KKJ sediment core is ±79  
63 years.

64 Based on this comparison, we interpret our decadal to centennial TOC record from KKJ  
65 sediments during the complete 9612 (+255/-144) years to mainly reflect qualitative changes in  
66 NAO-like atmospheric circulation. Analogue to the multi-millennial trend, main mechanistic  
67 linkage for the observed decadal to centennial TOC variability in KKJ might be the influences  
68 of the NAO polarity on winter temperature, ice cover duration and lake productivity.

69 This interpretation is supported by meteorological studies and monitoring results from several  
70 Swedish lakes indicating a significant influence of the NAO on annual to seasonal temperatures,  
71 ice cover duration and, consequently, productivity (Blenckner et al., 2004; Chen and Hellström,  
72 1999; Karlsson et al., 2005). Winter temperatures in Sweden are warmer, ice cover is shortened  
73 and productivity higher, when the NAO is in a positive mode (Blenckner et al., 2004; Chen and  
74 Hellström, 1999; Hurrell, 1995). The importance of the NAO for ice cover duration can be  
75 exemplarily described by monitoring results from three lakes in vicinity to KKJ (all 60°N in  
76 Sweden) covering the period AD 1961 to 2002 (Blenckner et al., 2004). Mean ice cover duration  
77 of the three lakes within this time-interval varies between 99 and 203 days and the NAO is one  
78 significant driver of the up to >3 months changes in ice cover duration (Blenckner et al., 2004;  
79 Ptak et al., 2019). In addition, NAO influences on ice cover duration of Swedish lakes are  
80 particularly strong south of 62°N where KKJ is located since the blocking of the North Atlantic  
81 zonal atmospheric circulation by the Scandinavian Mountains is minor (Blenckner et al., 2004).

82 Further influences of changes in Siberian High (SH) strength on productivity in KKJ are  
83 possible, since the lake is situated at the western boundary of this atmospheric system.  
84 However, on the one hand, meteorological investigations and paleoclimate reconstructions  
85 indicate that NAO and Siberian High changes are interdependent, particularly on long time-  
86 scales (Fig. 12). Siberian High strength tends to be reduced when the NAO is in a more positive  
87 mode (Chen et al., 2010; He et al., 2017). On the other hand, KKJ is located in direct vicinity  
88 to the North Atlantic within the path of the westerly storm tracks. Therefore, considering the

89 location of KKJ and intercontinental teleconnections, we prefer to relate the decadal to  
 90 centennial changes in TOC as driven by NAO-like changes in atmospheric circulation.  
 91  
 92  
 93

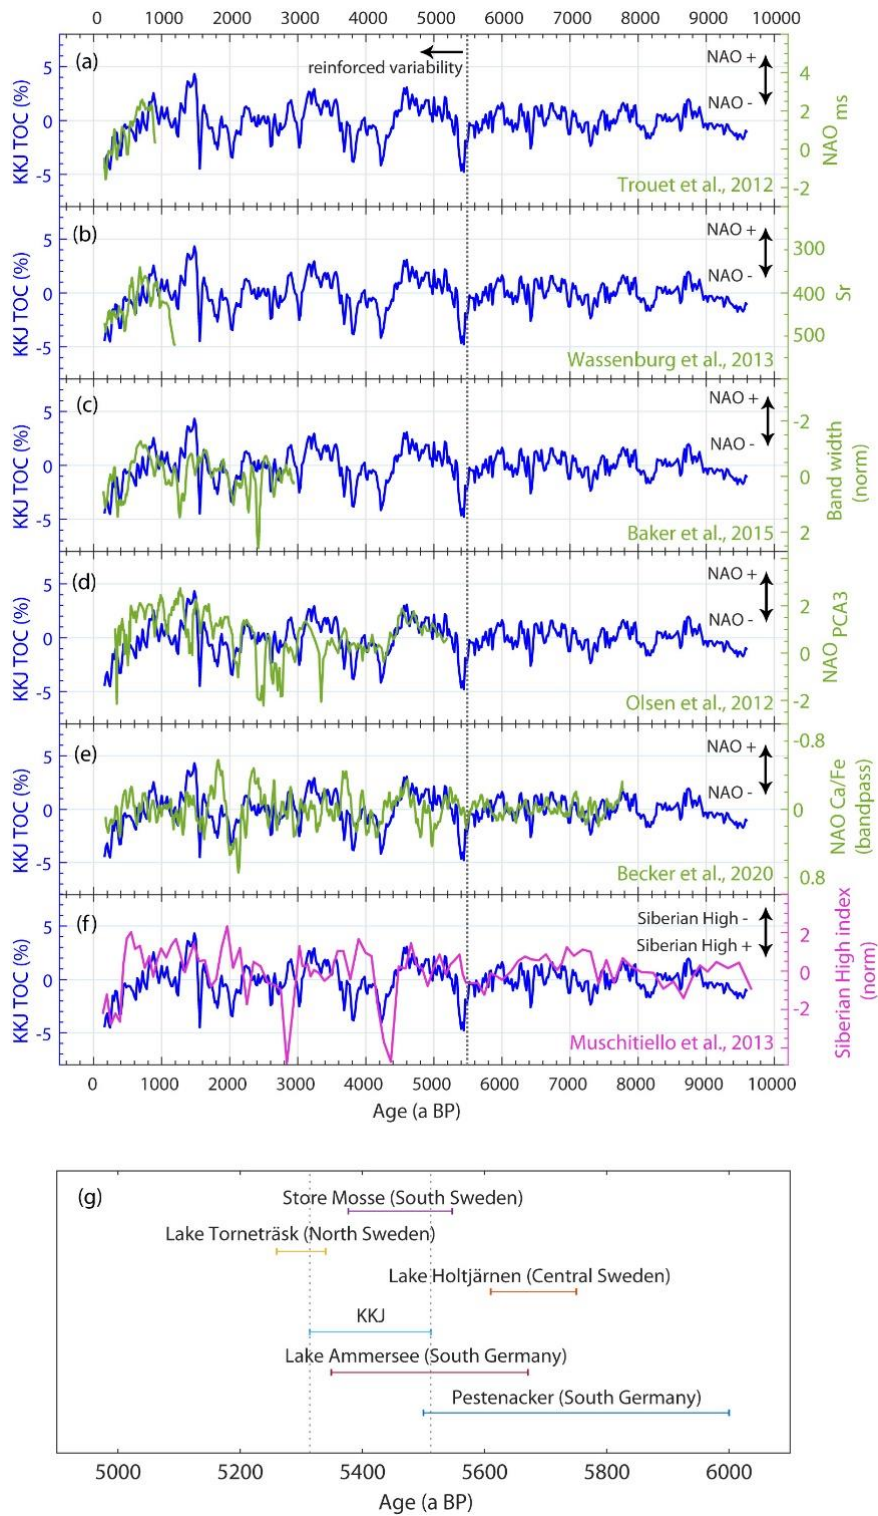

94  
 95  
 96 **Revised Fig 12.** The revised figure now includes a comparison of the KKJ TOC record with 5 different  
 97 **NAO reconstructions and an index of Siberian High strength (a-f).** In (g) we added the onset of  
 98 **reinforced paleoclimate variability at ~5450 a BP recorded in the nearby Store Mosse bog.** We will

99 [add the archive-type \(e.g. tree rings\) and geographical position of the compared NAO records to](#)  
100 [the figure caption.](#)

101

102

103

104

105 **Point by point response to Referee #1**

106 This is a very interesting study which attempts to provide insights into  
107 the North Atlantic Oscillation (NAO) variability throughout most of the  
108 Holocene. The detailed sedimentology from lake Kalksjon, west-central  
109 Sweden, is excellent and provides some justification for its use as a  
110 qualitative reconstruction of the NAO. Overall, I found the manuscript  
111 well written and will be of high interest for the paleoclimate community  
112 studying the climate during the Holocene for this region. It is therefore  
113 suitable for *Climate of the Past*. However, to assess this archive as a  
114 reconstructed "qualitative" record of the NAO, I believe there needs to be  
115 further examinations.

116 [Thank you!](#)

117

118 Major comments:

119 Different NAO reconstructions show periods of coherency and often no  
120 coherency at all. This is partly because the NAO itself exhibits non-  
121 stationary behavior, so the use of one single location may not capture the  
122 whole variability. One aspect that may have been overlooked in this paper  
123 is the other existing NAO proxies. Have you explored other records that may  
124 be sensitive to large-scale and long-term NAO fluctuations? That said, from  
125 1800BP to the present, the NAO from Olsen et al. (2012) and the TOC record  
126 don't seem to match quite well, but perhaps if you plot different  
127 reconstructed NAO, a better co-variability (correlation) may be seen. I am  
128 thinking of speleothems in Europe and North Africa as well as the new one  
129 from Becker et al. (2020). See also Wassenburg et al. 2016 *Nat Geosci*,  
130 Baker et al. 2015, etc.

131 [Please see our Detailed Response.](#)

132

133 Figure 12 shows the relationship between paleo NAO (Olsen et al. 2012) and  
134 the TOC content in the studied lake. When sampling both records to the  
135 lowest resolution of the corresponding record; do you find any significant  
136 correlations? Same comment for the Siberian High.

137 [Please see our Detailed Response.](#)

138

139 Also, the lack of coherence between your record and other NAO proxies could  
140 be explained by other mode of variability that may have been more  
141 persistent in the past. The Scandinavian Blocking, for example, accounts  
142 for ~27% of the winter North Atlantic variability. A persistent  
143 Scandinavian Blocking in winter would translate to cooler conditions in the  
144 region, thereby presumably increased ice cover time (in turn less

145 productivity). Any thoughts on this? I suggest to add more discussion  
146 around line 345.

147 [Please see our Detailed Response.](#)

148

149 Some other minor comments:

150 Figure 3: Given you are dealing with decadal to centennial scale  
151 variability, I think an average (monthly?) of temperature and precipitation  
152 would improve visualization.

153 [We revised Fig. 3 following the referee's suggestions:](#)

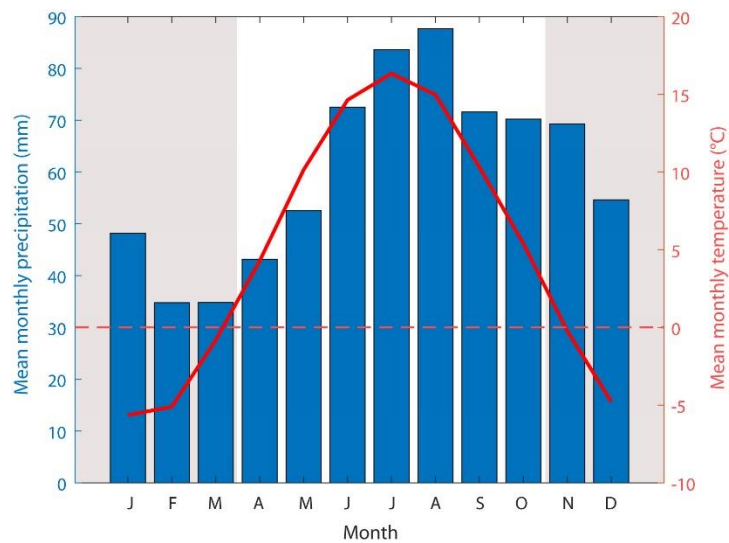

154

155 [Revised Fig. 3 now showing monthly averaged precipitation and temperature data from the  
156 meteorological station Torsby \(~5 km west of Lake Kälksjön\) for the observation period.](#)

157

158 Figure 4 shows the composite with the XRF cluster stratigraphy. It should  
159 be located after figure 7 (PCA of the elements).

160 [We agree with Referee #1 that the XRF cluster stratigraphy in Fig. 4 should be in theory  
161 located after Fig. 7. However, without the direct comparison with the  \$\delta^{13}\text{C}\$ , TOC, C/N, S/Ti  
162 and Ti proxies from KKJ sediments a lot of information about the cluster stratigraphy and the  
163 connected sedimentology would get lost. Therefore, we would like to keep the cluster  
164 stratigraphy in Fig. 4. To account for the reviewer's comment, we added to the text '\(see Fig.  
165 4\)', when the XRF cluster stratigraphy is mentioned.](#)

166 [Additionally, we slightly modified the caption of Fig. 7 into:](#)

167 **Figure 7: Statistical analyses of the XRF profiles from Lake Kälksjön (KKJ) sediments. (a) Covariance**  
168 **biplot visualizing the correlations of the main elements with regard to the first two principal**  
169 **components. (b) Hierarchical clustering solution reflecting the difference between the detrital**  
170 **sediments of SDU 1, 2, and 5 and organic sediments of SDU 3, 4, and 6.**

171

172 Figure 4: Add average temporal resolution for each cluster, i.e., mm/year

173 To improve/keep the readability of Fig. 4, we added the requested information to section  
174 5.1. (Holocene evolution of Lake Källsjön). Only the names of the SDU remained as text in  
175 the figure. Please see also the related comment to Referee #2, requesting SDU age ranges in  
176 Fig. 4.

177

178 Figure 10: the sharp decline in TOC falls within 4.2k BP. Do you consider  
179 that your proxy responded to the 4.2k event?

180 Considering the complete TOC record from KKJ sediments shown in Fig. 12, the drop in TOC  
181 at 4.2 ka is not unique and appears somewhat short for marking the coinciding climate  
182 event. Therefore, we would like to avoid a discussion about the connection of this peak to  
183 the 4.2 ka climate event.

184

185 Figure 12: we don't see much the Trouet et al. NAO, the color is too pale.  
186 Also, why not the selection of the Ortega et al. reconstructed NAO?

187 Please see our Detailed Response and the revised Fig. 12. We omitted the NAO  
188 reconstruction by Ortega et al. (2015) for the last millennium since it does not reflect the  
189 shift from a more negative to more positive NAO polarity between the Little Ice Age and  
190 Medieval Warm Period that is the most distinctive last millennium feature in the other 5  
191 NAO reconstructions used in this study.

192

193 Figure 12: the lines of the SH index are outside the x-axis.

194 We corrected that.

195

196 Figure 13: the spectral peaks don't seem to match quite well, perhaps a  
197 cross-spectral analysis would give something better. I would suggest moving  
198 this to the supplement.

199 Considering the non-stationarity of the NAO suggested by the Referee, we prefer not to  
200 show spectral analyses or cross wavelet analyses in the updated manuscript.

201

202 Line 89: could you provide more information as to how the grain-size was  
203 extracted?

204 The particles-sizes of individual detrital grains were measured with a scale under the  
205 microscope. We added 'microscopic' to the text.

206

207 Section 3.3: provide information on how many thin-sections were produced.

208 We added to the text that 80 thin-sections were produced from KKJ sediments.

209

210 Section 3.5: Why no pollen analysis on other SDU?

211 Pollen analysis were performed on KKJ sediments to cover the transition between SDU 3 and  
212 4 (transition to higher amplitudes in the TOC record) and the recent period of most distinct  
213 human activity. For the remaining periods without exceptional variability in KKJ TOC record,  
214 we believe that it is appropriate to refer to pollen results from nearby lakes to rule out major  
215 human influences.

216

217 Section 4.3: Add a Table showing the matrix correlation between  $\mu$ -XRF data

218 We added the following table with a correlation matrix for the XRF data from KKJ sediments  
219 to the manuscript:

220 **New Table. Correlation matrix for the XRF profiles from the Lake Kälksjön KKJ19 composite profile.**

|    | Al | Si   | S     | K     | Ca    | Ti    | Mn    | Fe    |
|----|----|------|-------|-------|-------|-------|-------|-------|
| Al | 1  | 0.95 | -0.92 | 0.81  | 0.75  | 0.87  | -0.37 | -0.83 |
| Si |    | 1    | -0.92 | 0.90  | 0.71  | 0.90  | -0.28 | -0.92 |
| S  |    |      | 1     | -0.88 | -0.70 | -0.91 | 0.14  | 0.77  |
| K  |    |      |       | 1     | 0.45  | 0.91  | -0.04 | -0.83 |
| Ca |    |      |       |       | 1     | 0.61  | -0.46 | -0.68 |
| Ti |    |      |       |       |       | 1     | -0.35 | -0.82 |
| Mn |    |      |       |       |       |       | 1     | 0.25  |
| Fe |    |      |       |       |       |       |       | 1     |

221

222

223 Line 104: 3s is deem low. Is this a typo?

224 3 seconds is correct. Using the latest XRF detector in combination with high electric current  
225 (60 mA) allows measuring with such low acquisition time.

226

227 Line 105: why only these elements? For example, why is Ca omitted?

228 The elements mentioned in line 105 are selected based on the amount of zero-values and  
229 replicate measurements. This is now explained in lines 102-107.

230

231 Line 106: How did you build the  $\mu$ -XRF composite? Elements often decrease  
232 (increase) their values at both edge of the sediment sections. Did you  
233 remove those data?

234 The XRF data were measured for composite profile KKJ19 omitting sediment core endings.  
235 We added to the text that the XRF data were acquired for composite profile KKJ19.

236

237 Line 239: There is no Ca profile showing these peaks. Maybe add into  
238 supplement.

239 Instead of adding an additional figure with Ca, we now refer to the microscopically visible  
240 liming layers at 3.5 and 5 cm composite depth. A micrograph of one of these layers is shown  
241 in Fig. 4.

242

243 Line 364-365: Please rephrase

244 The rephrased sentence:

245

246 Decadal to centennial productivity changes revealed by the KKJ sediment record indicate a  
247 shift towards reinforced variability concurrent with the onset of Neoglaciation ~5450 cal. a  
248 BP (Fig. 12).

249

250

251

252 Thank you very much!

253

254

255

256

## 257 Point by point response to Referee #2

258 I agree with reviewer 1 that this is a very interesting and well-written  
259 paper that provides new insight into NOA variability using a Swedish lake  
260 record. I am, however, not an expert in NAO and NAO variability so I have  
261 focused my review on other aspects of the paper.

262 Thank you!

263

264 Comments:

265 Line 18 Maybe a minor comment, but I think that LKJ would be a better  
266 acronym than KKJ



267 We prefer to continue using KKJ as acronym for Lake Kälksjön. The works on this sediment  
268 archive in different laboratories since the coring in 2019 were performed using KKJ. A  
269 changed acronym might cause confusion during future work on this sediment archive.

270

271 Line 19 I prefer CE (Common Era) rather than AD

272 We replaced AD with CE in the text and figures.

273

274 Line 42 Here it might be useful if you define what you mean with the  
275 western Baltic region (or the western Baltic Sea region?). There are at  
276 least ten different definition of the "Baltic Region" in Wikipedia

277 We now define in line 35 that our 'Western Baltic region' comprises 'south-central  
278 Scandinavia'.

279

280 Line 55 I checked the Swedish Land Survey online maps and long. 13°03'E  
281 is more correct.

282 Thank you. We changed this information accordingly.

283

284 Line 59 west

285 Corrected.

286

287 Line 63 Figure 3 shows daily temperatures and precipitations, not mean  
288 monthly temperatures, see also comment by Rev. 1

289 The revised Fig. 3 now shows mean monthly temperature and precipitation values for the  
290 observation period at the SMHI station Torsby. Please see the revised figure in our response  
291 to Referee #1.

292

293 Line 105 I agree with Rev. 1, why was not e.g. Zr and Ca analysed.

294 As stated before, the elements mentioned in line 105 are selected based on the amount of  
295 zero-values and replicate measurements. This is now explained in lines 102-107.

296

297 Line 228 I would use "concentrations of the artificial radionuclides"  
298 rather than "contents"

299 We replaced 'contents' with 'concentrations'.

300

301 Line 238 See comment by Rev. 1. Was Ca measured after all?

302 Please see the comment above. Yes, Ca was measured. A positive correlation with the  
303 elements Ti and K indicates its predominantly detrital origin.

304

305 Line 266 I was slightly confused by the discussion about the isolation of  
306 the lake basin from Ancient Lake Vänern. I have not read the Risberg et al  
307 paper in any detail, but the uplift history of the area is complicated with  
308 evidence of irregular postglacial isostatic uplift. Hence, the comment that  
309 the isolation of L. Skjutsbolstjärnet located at a similar location (and  
310 what is meant by that?) and height supports your isolation point must be  
311 clarified (or deleted?). The isolation age of L. Skjutsbolstjärnet is c.  
312 9600 uncalibrated C14 years which calibrates to c. 10,900 cal a BP

313 Based on the comment of Referee #2 on the irregular uplift history of the region around KKJ,  
314 we deleted the information about the isolation age of Lake Skjutsbolstjärnet.

315

316 Line 269 cal is missing before "a BP" (Stanton et al. 2010)

317 We added cal.

318

319 Line 313 typo? Should be east of L. Kälksjön

320 We corrected the typo.

321

322 Line 318 My alternative interpretation of the TOC contents would be "a  
323 sharp increase until ca 4500 cal a BP with a drop at ca. 5300 cal a BP",  
324 i.e. the increase continues another 1000 years, followed by more stable  
325 values until recent times. I would also add  $\delta^{13}\text{C}$  to Figure 10.

326 As suggested by Referee #2, the revised Fig. 10 now also shows  $^{13}\text{C}_{\text{org}}$  along with TOC from  
327 KKJ sediments. Comparing both records from KKJ sediments indicates the difficulties of  
328 identifying a certain change-point in its multi-millennial behavior. Therefore, we slightly  
329 modified the connected sentence to:

330 The multi-millennial upward trend in TOC contents (and simultaneously increasing  $\delta^{13}\text{C}_{\text{org}}$   
331 values) interpreted to reflect progressively increasing productivity in KKJ reveals a sharper  
332 increase until the Mid-Holocene, followed by a more moderate rise until recent times.

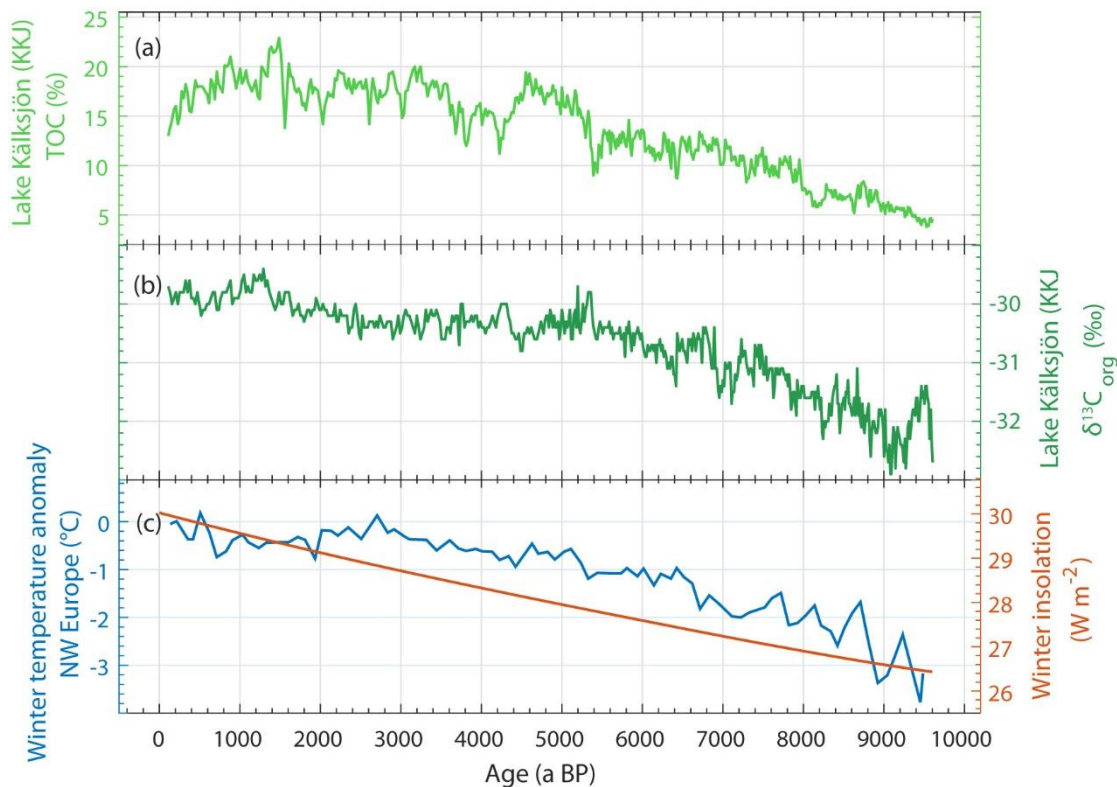

333

334 **Revised Fig. 10 now also showing  $^{13}\text{C}_{\text{org}}$  from KKJ sediments.**

335

336 Line 331 Does this refer to winter or annual temperatures, precipitation  
337 and windiness?

338 **We added 'winter' to the related sentence.**

339

340 Line 341 I am not certain that the reference to Almquist-Jacobson is 100%  
341 correct here. Almquist-Jacobson's sites are situated in an area that may  
342 have been settled by humans later than the river and lake valleys in  
343 Värmland. There are archaeological findings north and north-west of Torsby  
344 dating back to the early Neolithic (3800-3300 BC)

345 **The thank the referee about the information on early Neolithic findings north and north-**  
346 **west of Torsby. However, we did not find coincidences between changes in the TOC record**  
347 **and changes in pollen indicators of human activity directly from KKJ sediments during this**  
348 **early Neolithic period.**

349 **We replaced the reference to Almquist-Jacobsen with the one by Eddudottir et al. (2021)**  
350 **finding an increase in human activity at about the same time (2100 a BP) in the much more**  
351 **nearby Lake Karebolssjön (~25 km northeast of KKJ). Still, there is no corresponding change**  
352 **in the TOC record from KKJ sediments.**

353

354 Line 364-374 Here you should also discuss proxy records from Sweden  
355 showing climate shifts at this time, e.g. the peat record from Store Mosse  
356 (Kylander et al., 2013; QSR) and lake level records from L. Bysjön  
357 (Digerfeldt, 1988; Boreas). These could also be shown to Fig. 12.

358 We agree with Referee #2 about the importance of adding results from the regional  
359 paleoclimate records of the Store Mosse bog and Lake Bysjön to our discussion on reinforced  
360 NAO-like atmospheric variability since ~5450 a BP. Supporting our interpretation, the PC4  
361 dust time-series from the nearby Store Mosse bog reflecting wind changes depicts enhanced  
362 variability since this time. We added this information to the revised Fig. 12 and the text.  
363 Enhanced shorter-term variability since about 5450 a BP is also present in the lake level  
364 curve from Bysjön. However, the low resolution of the record inhibits detecting a certain  
365 change-point and possible high-amplitude variations. Therefore, we mention the result of  
366 shorter-term lake level variability since about 5450 a BP only in the text.

367

368 Line 546 Change Väners to Vänern

369 Done.

370

371 Table 1 If possible, give weights and type of material (e.g. terrestrial  
372 or lacustrine plant remains?)

373 We added to Table 1 that all <sup>14</sup>C dated material is terrestrial. The weights of the samples are  
374 unknown. But, BETA rejects samples before the <sup>14</sup>C measurement, if they are too small.

375

376 Figure 2 Give the source of the historic document. Museum, library?

377 We added to the caption of Figure 2 that the document was provided by a local historian.

378

379 Figure 4 Sediment deposition units. Give the age range for each SDU, if  
380 possible, not only the onset

381 Please see also our comment on Fig. 4 above. To improve/keep the readability of Fig. 4, we  
382 added all requested information to section 5.1. (Holocene evolution of Lake Kälksjön). Only  
383 the names of the SDU remained as text in the figure.

384

385 Thank you very much!
